# Supplementary material for: Nanoscale morphology dependent pseudocapacitance of NiO: Influence of intercalating anions during synthesis
Source: Royal Society of Chemistry journal article supplement (doi:10.1039/c0nr00555j), 2010-12-22
Supplement: c0nr00555j.pdf [file c0nr00555j.pdf]

## Electronic Supplementary Information

### Nanoscale morphology dependent pseudocapacitance of NiO: Influence of intercalating anions during synthesis

Sumanta Kumar Meher, P Justin and G Ranga Rao\*

Table S1 TGA data of uncalcined samples

| Sample   | Weight loss (%) due to structural water |          | Weight loss (%) due to crystalline water |                    |          |
|----------|-----------------------------------------|----------|------------------------------------------|--------------------|----------|
|          | Temp. (°C)                              | Loss (%) | Temp. (°C)                               | Decomp. temp. (°C) | Loss (%) |
| NiO-C-uc | 25-205                                  | 18       | 205-400                                  | 290                | 20       |
| NiO-N-uc | 25-205                                  | 16       | 205-400                                  | 285                | 19       |
| NiO-A-uc | 25-205                                  | 11       | 205-400                                  | 285                | 20       |

Table S2 XRD results of various NiO samples

| Sample | $d_{hkl}$ | d spacing (Å) | FWHM (2θ) | Crystallite size (nm) | Average crystallite size (nm) |
|--------|-----------|---------------|-----------|-----------------------|-------------------------------|
| NiO-C  | 111       | 2.42          | 2.38      | 3.48                  | 3.75                          |
|        | 200       | 2.09          | 2.35      | 3.60                  |                               |
|        | 220       | 1.48          | 2.20      | 4.18                  |                               |
| NiO-N  | 111       | 2.43          | 2.50      | 3.32                  | 3.49                          |
|        | 200       | 2.10          | 2.56      | 3.30                  |                               |
|        | 220       | 1.49          | 2.38      | 3.86                  |                               |
| NiO-A  | 111       | 2.44          | 2.75      | 3.05                  | 3.18                          |
|        | 200       | 2.11          | 2.90      | 2.91                  |                               |
|        | 220       | 1.49          | 2.56      | 3.59                  |                               |

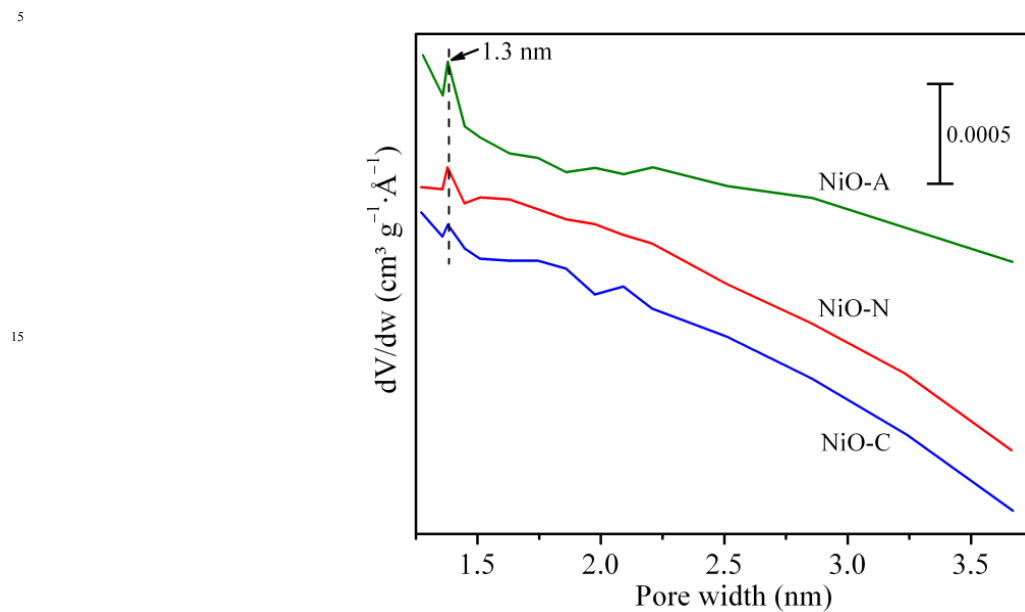

Fig. S1 Pore size distribution of calcined NiO-N, NiO-A and NiO-C samples obtained using HK method.

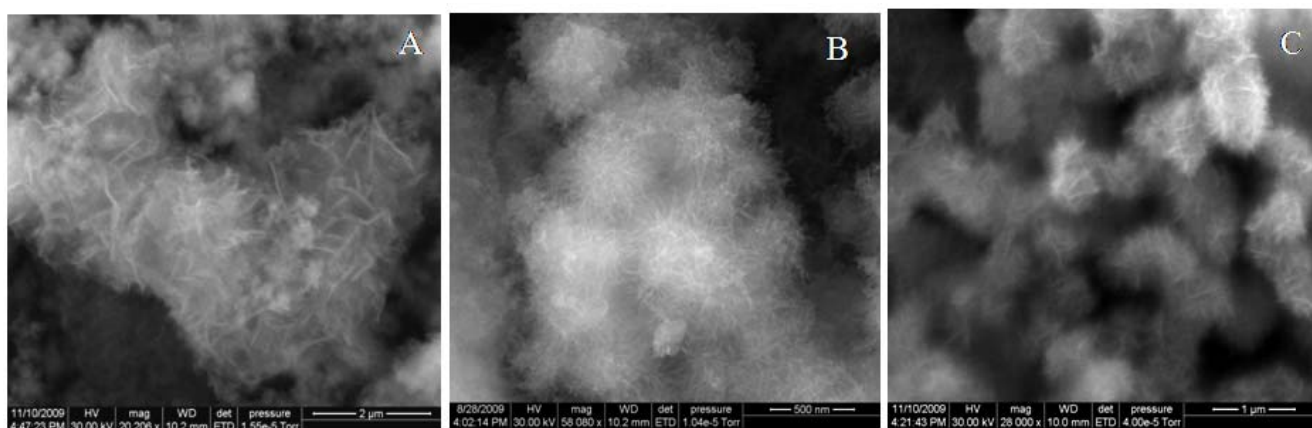

Fig. S2 FESEM images of (A) NiO-A-uc, (B) NiO-N-uc and (C) NiO-C-uc samples (uncalcined Ni hydroxides).

5

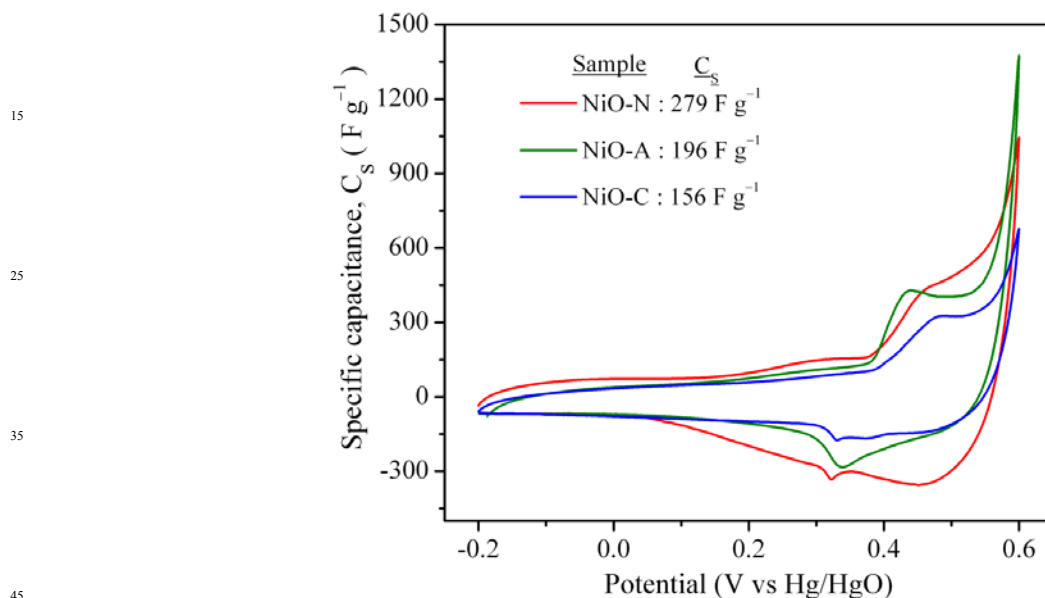

45

Fig. S3 Specific capacitance values of calcined NiO-N, NiO-A and NiO-C samples calculated from the cyclic voltammetry measurements at a scan rate of  $5\ mV\ s^{-1}$ .

50

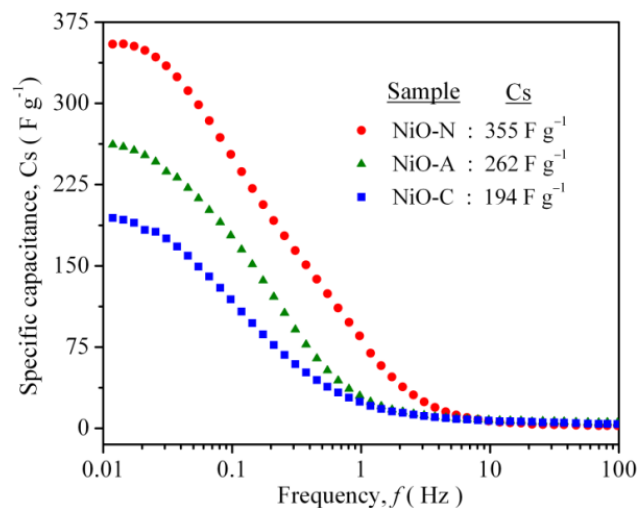

80

Fig. S4 The specific capacitance values of NiO-N, NiO-A and NiO-C electrodes calculated from the respective impedance spectra as a function of the frequency.

85
